# Supplementary material for: Disruption of Escherichia coli Nissle 1917 K5 Capsule Biosynthesis, through Loss of Distinct kfi genes, Modulates Interaction with Intestinal Epithelial Cells and Impact on Cell Health
Source: PubMed Central journal article supplement (PMC4366286; doi:10.1371/journal.pone.0120430), 2015-03-19
Supplement: pone.0120430.s003.pdf [file pone.0120430.s003.pdf]

**Supplementary Table 2: Primers used in this study**

| Primer                                 | Sequence (5'→3')                                                                                  | AT (°C) <sup>a</sup> | PCR product                                                                                                                                                                              | Source                      |
|----------------------------------------|---------------------------------------------------------------------------------------------------|----------------------|------------------------------------------------------------------------------------------------------------------------------------------------------------------------------------------|-----------------------------|
| <b>NPT2_F1</b><br><b>NPT2_R1</b>       | CTTGCTCGAGGCCGCGATTAAT<br>TTCCATAGGATGGCAAGATCCTGG                                                | 62                   | Segment of mini-Tn5 <i>nptII</i> gene.                                                                                                                                                   | Jones <i>et al.</i><br>(59) |
| <b>EcNkfiB_F</b><br><b>EcNkfiB_R</b>   | TAGTCGGACATCCTGGCTCA<br>GCCCTTGATTTTAGCTCTCC                                                      | 56.3                 | <i>kfiB</i> locus in EcN K5 biosynthesis cluster                                                                                                                                         | This study                  |
| <b>EcNkfiC_F</b><br><b>EcNkfiC_R</b>   | GGGACAAATATTGGTGCTCTTG<br>GTCTTGCCGCGATATCACTA                                                    | 52.2                 | <i>kfiC</i> locus of EcN K5 biosynthesis cluster                                                                                                                                         | This study                  |
| <b>kfiB.int_F<sup>1</sup></b>          | <u>CAACAACAATTA</u> ACTTAAATGGAAGGGTAATGAATCCAAAT<br><u>ATCGAATTA</u> <b>AGTGTGCTGGAATTCGCCCT</b> | 70.8                 | Construction of the<br><i>dif</i> <i>E. coli</i> - <i>cat</i> - <i>dif</i> <i>E. coli</i> Cassette (from pTOPO-DifCAT<br>plasmid ) for deletion of a 1,552 -nt segment of <i>kfiB</i> .  | This study                  |
| <b>kfiB.int_R<sup>1</sup></b>          | <u>TCAGATAGTTGAACATTTTTT</u> GAAAGAAATTGGCATGAACT<br><u>CACCAAATTC</u> <b>TGCAGAATTCGCCCTTCCT</b> |                      |                                                                                                                                                                                          |                             |
| <b>kfiC.int_F<sup>1</sup></b>          | <u>CTTCGAGATTGTGATATATATCCATCAGGTAGAGCTTCTGT</u><br><u>TCCTTTATT</u> <b>AGTGTGCTGGAATTCGCCCT</b>  | 70.8                 | Construction of the<br><i>dif</i> <i>E. coli</i> - <i>cat</i> - <i>dif</i> <i>E. coli</i> Cassette (from pTOPO-DifCAT<br>plasmid ) for deletion of a 1, 257 -nt segment of <i>kfiC</i> . | This study                  |
| <b>kfiC.int_R<sup>1</sup></b>          | <u>CAATTCATAAGGAGAAA</u> AGTTGATCTTCAACATAAAAACTCG<br><u>CCTTTAAAACTGCAGAATTCGCCCTTCCT</u>        |                      |                                                                                                                                                                                          |                             |
| <b>Xer-cise_F</b><br><b>Xer-cise_R</b> | AGTGTGCTGGAATTCGCCCT<br>CTGCAGAATTCGCCCTTCCT                                                      | 58.4                 | <i>dif</i> <i>E. coli</i> - <i>cat</i> - <i>dif</i> <i>E. coli</i> cassette control                                                                                                      | This study                  |
| <b>RTkfiA_F</b><br><b>RTkfiA_R</b>     | TGTTGGGATTCATGGCTGTA<br>TGCGATTGCTTGTGTTTCTT                                                      | 52.2                 | Internal segment of <i>kfiA</i>                                                                                                                                                          | This study                  |
| <b>RTkfiB_F</b><br><b>RTkfiB_R</b>     | GGCTGCATTATGGGAGGTAG<br>TGTTCCAACGCTCTTGAC                                                        | 56.3                 | Internal segment of <i>kfiB</i>                                                                                                                                                          | This study                  |
| <b>RTkfiC_F</b><br><b>RTkfiC_R</b>     | ATTGTCGCCCAAACAAAAAG<br>ACAATCATCGCACACGAGAA                                                      | 52.2                 | Internal segment of <i>kfiC</i>                                                                                                                                                          | This study                  |
| <b>RTkfiD_F</b><br><b>RTkfiD_R</b>     | TTGGTCTGAATACGCGTCAG<br>CCCGTTCAAAGGTGAGTTA                                                       | 56.3                 | Internal segment of <i>kfiD</i>                                                                                                                                                          | This study                  |

| Primer             | Sequence (5'→3')                    | AT (°C) <sup>a</sup>                                       | PCR product                                                    | Source      |
|--------------------|-------------------------------------|------------------------------------------------------------|----------------------------------------------------------------|-------------|
| <b>PRL27Prmr 1</b> | GAGTCAGCAACACCTTCTTC                | Manoil <sup>2</sup>                                        | Mini-Tn5 specific 1 <sup>st</sup> round PCR                    | This study  |
| <b>Primer 2a</b>   | GGCCACGCGTCGACTAGTACNNNNNNNNNNAGAG  |                                                            | Degenerate 1 <sup>st</sup> round primer                        |             |
| <b>Primer 2b</b>   | GGCCACGCGTCGACTAGTACNNNNNNNNNNACGCC |                                                            | Degenerate 1 <sup>st</sup> round primer                        | Manoil (55) |
| <b>Primer 2c</b>   | GGCCACGCGTCGACTAGTACNNNNNNNNNNGATAT |                                                            | Degenerate 1 <sup>st</sup> round primer                        |             |
| <b>PRL27Prmr 3</b> | AGCTTCAGGGTTGAGATGT                 |                                                            | Mini-Tn5 specific 2 <sup>nd</sup> round PCR. Sequencing primer |             |
| <b>Primer 4</b>    | GGCCACGCGTCGACTAGTAC                | 2 <sup>nd</sup> Round primer specific for 2a,b,c overhangs |                                                                |             |

<sup>a</sup> AT - Annealing temperature applied in PCRs using listed primers

<sup>1</sup> For primers used for construction of deletion mutants (*kfiB.int\_F/R* and *kfiC.int\_F/R*; 70-nt in length), underlined sections show regions homologous to termini of target genes. Sections in bold show regions homologous to the pTOPO-DifCAT vector.

<sup>2</sup> For primers used to amplify regions flanking mini-Tn5 inserts, AT and PCR conditions are described in the original reference, Manoil (55).

59. Jones BV, Young R, Mahenthiralingam E, Stickler DJ. Ultrastructure of *Proteus mirabilis* swarmer cell rafts and role of swarming in catheter-associated urinary tract infection. *Infect Immun.* 2004; 72: 3941-3950.
