# Supplementary material for: Disruption of Escherichia coli Nissle 1917 K5 Capsule Biosynthesis, through Loss of Distinct kfi genes, Modulates Interaction with Intestinal Epithelial Cells and Impact on Cell Health
Source: PLOS journal article supplement (doi:10.1371/journal.pone.0120430), 2015-03-19
Supplement: S2 (10.1371/journal.pone.0120430.s002) [file journal.pone.0120430.s002]

**Supplementary Table 1: Summary of mutant characteristics and experimental results.**

| Assay/Figure                                                                                  | Wild-type                                                                          | EcNΔ <i>kfiB</i>                                                                                                                                        | EcNΔ <i>kfiC</i>                                                                                                                          | JNBF17 mini-Tn5 KpsT                                                                        |
|-----------------------------------------------------------------------------------------------|------------------------------------------------------------------------------------|---------------------------------------------------------------------------------------------------------------------------------------------------------|-------------------------------------------------------------------------------------------------------------------------------------------|---------------------------------------------------------------------------------------------|
| <b>Biofilm formation</b><br>(Table 1 & Fig. 2)                                                | +                                                                                  | ++                                                                                                                                                      | +                                                                                                                                         | ++                                                                                          |
| <b>ΦK5 sensitivity</b><br>(Fig. 2)                                                            | S                                                                                  | R                                                                                                                                                       | R                                                                                                                                         | R                                                                                           |
| <b>Adherence to Caco-2</b><br>(Fig. 1 & 2)                                                    | +                                                                                  | ++                                                                                                                                                      | +                                                                                                                                         | +                                                                                           |
| <b>Apoptosis</b><br>(Fig. 3)                                                                  | -                                                                                  | ++                                                                                                                                                      | -/+                                                                                                                                       | NT                                                                                          |
| <b>LDH release</b><br>(Fig. 3)                                                                | +                                                                                  | +++                                                                                                                                                     | ++/-                                                                                                                                      | NT                                                                                          |
| <b>COX-2 expression</b><br>(Fig. 3)                                                           | +                                                                                  | +                                                                                                                                                       | ++                                                                                                                                        | NT                                                                                          |
| <b>Caco-2 cell cytoskeleton and nuclear integrity</b><br>(Fig. 3)                             | Comparable to untreated cells                                                      | Increased incidence of condensed and/or fragmented nuclei. Considerable rearrangements in cell cytoskeleton                                             | Occasional condensed/defragmented nuclei observed. Some indication of cytoskeletal alterations but largely comparable to wt treated cells | NT                                                                                          |
| <b>Cell morphology</b><br>(Fig. 4)                                                            | Predominantly short vegetative cells, but highly elongated cells commonly observed | Very short vegetative cells                                                                                                                             | Very short vegetative cells                                                                                                               | Short vegetative cells with numerous elongated cells                                        |
| <b>Aggregation</b><br>(Fig. 4)                                                                | No aggregation                                                                     | Frequent large aggregates of closely associated cells common                                                                                            | Small aggregates of closely associated cells rarely observed                                                                              | Frequent large aggregates of loosely associated cells, dominated by elongated morphologies. |
| <b>Motility</b><br>(data not shown)                                                           | +                                                                                  | -/+                                                                                                                                                     | +                                                                                                                                         | +                                                                                           |
| <b>Predicted impact on K5 biosynthetic complex formation (KfiABCD complex)</b><br>(Fig. S1) * | Intact fully functional                                                            | Absence of KfiB. KfiA,D functional and localised to membrane. Unstable association of KfiC with KfiA, abolishing KfiC contribution to polymer synthesis | Absence of KfiC. KfiA, KfiB and KfiD functional but unable to localise to membrane resulting and form biosynthetic complex.               | Intact fully functional                                                                     |

|                                                                                                                    |                         |                                                                                           |                                                                                           |                                                             |
|--------------------------------------------------------------------------------------------------------------------|-------------------------|-------------------------------------------------------------------------------------------|-------------------------------------------------------------------------------------------|-------------------------------------------------------------|
| <b>Predicted impact on<br/>phosphatidyl<br/>acceptor and kdo<br/>linkage (KpsSCFU<br/>complex)<br/>(Fig. S1) *</b> | Intact fully functional | Intact and functional,<br>but polysaccharide<br>chain synthesis not<br>initiated/unstable | Intact and functional,<br>but polysaccharide<br>chain synthesis not<br>initiated/unstable | Intact fully functional                                     |
| <b>Predicted impact on<br/>Export machinery<br/>(KpsTMDE complex)<br/>(Fig. S1) *</b>                              | Intact fully functional | Intact fully functional                                                                   | Intact fully functional                                                                   | Channel formed but<br>transport blocked by<br>loss of KpsT. |

---

\* Predictions regarding impact of specific gene disruptions on the wider K5 biosynthetic machinery are based on previous studies examining loss of specific genes on the K5 assembly process, and draw upon studies by Petit *et al.* (24); Griffiths *et al.* (36); Bliss *et al.* (43); Hodson *et al.* (44); Rigg *et al.* (47); and comprehensive reviews by Whitfield (41); Corbett and Roberts (45); and Whitfield and Roberts (46).
